# Supplementary figures and images for: A CO-mediated photothermal therapy to kill drug-resistant bacteria and minimize thermal injury for infected diabetic wound healing
Source: Royal Society of Chemistry journal article supplement (doi:10.1039/d3bm00774j), 2023-01-01

**PBS**

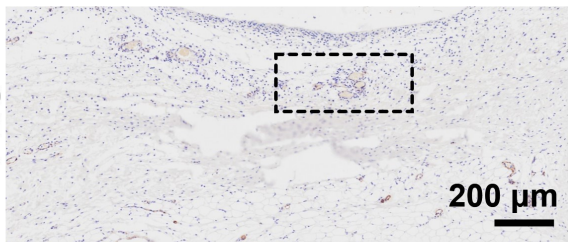

**mPDA**

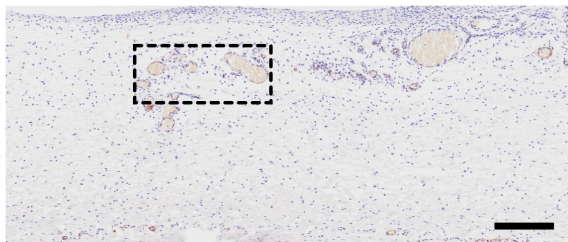

**CO@mPDA**

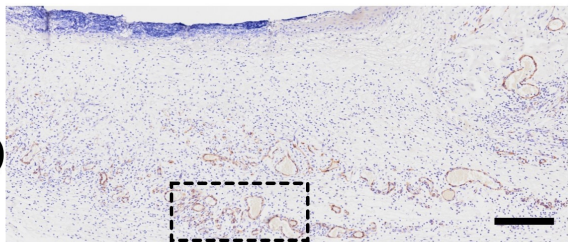

Supplement: d3bm00774j2.pdf [file d3bm00774j2.pdf]
